# Supplementary material
Source: PubMed Central journal article supplement (PMC3565552)
Supplement: Supp_Fig2.pdf [file Supp_Fig2.pdf]

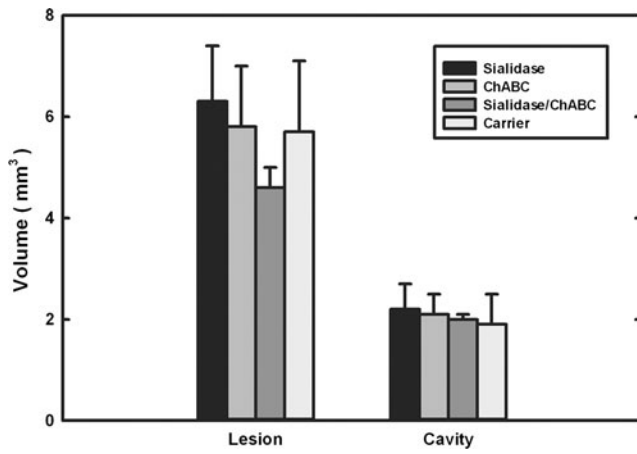

**SUPPLEMENTARY FIG. S2.** Enzymatic treatment does not affect lesion size or tissue damage. Five weeks following contusion spinal cord injury (SCI) and subsequent treatment, rats were perfusion fixed and spinal cord sections were stained with Eriochrome and cresyl violet as described in the text. Volumes of the lesion and cavity were calculated around the injury site. No differences were detected among treatment groups.
